# Supplementary material for: The splicing modulator sudemycin induces a specific antitumor response and cooperates with ibrutinib in chronic lymphocytic leukemia
Source: PubMed Central journal article supplement (PMC4673195; doi:10.18632/oncotarget.4212), 2015-06-08
Supplement: oncotarget-06-22734-s001.pdf [file oncotarget-06-22734-s001.pdf]

## SUPPLEMENTARY DATA AND TABLE

### Results

#### *RELA* sequence

##### *Consensus sequence*

GATGAGATCTTCCTACTGTGTGACAAGGTGCAGAAAGGTATACATCAGGAGGCAGGGGTGGGCTCT  
TGGGAGCAAGGGGTGAAGCTGAGCAGAGAAGTGGAGTGTGAGGTAAGTGGCTTTGGATACTTCCTCCTGTGCC  
TCGGGGGCTCAGGAGGACATTGAGGTGTATTTACGGGACCAGGCTGGGAGGCCGAGGCTCCTTTTCGCAA  
GCTGATGTGCACCGACAAGTGGCCATTGTGTTCGGACCCCTCCCTACGCAGACCCAGCCTGCAGGCTCCTGT  
GCGTGTCTCCATGCAGCTGCGGCGGCCTTCGACCGGGAGCTCAGTGAGCCCATGGAATTCCAGTACCTGCC  
AGATACAGACGATCGTCACCGGATTGAGGAGAAACGTAAAAGGACATATGAGACCTTCAAGAGCATCATGAA  
GAAGAGTCCTTTACGCGGACCCACCGACCCCGGCCTCCACCTCGA CGCATTGCTGTGCCTTCCC

Legend: Exon 7 Exon 8 Exon 9 Exon 10

##### *Sudemycin-induced isoform sequence*

GATGAGATCTTCCTACTGTGTGACAAGGTGCAGAAAGACGATCGTCACCGGATTGAGGAGAAACGT  
AAAAGGACATATGAGACCTTCAAGAGCATCATGAAGAAGAGTCCTTTCAGCGGACCCACCGACCCCGGC  
CTCCACCT CGACGCATTGCTGTGCCTTCCC

Legend: Exon 7 Exon 9 Exon 10

#### *IBTK* sequence

##### *Consensus sequence*

TGTGGATCTCAGAACTATCATGGAAATAGAAGAAAGTAGACAAAAATGTGGAGCTACACCAAAGTCAC  
ATTTAGGCAAAACAGTTTCTCATGGAGTTAACTTTCTCAGAAGCAACGAAAAATGATTGCATTGACTA  
CCAAGGAAAAACAATTCAGGAATGAATAGCATGGAAACAGTTTATTCACTCCTTCAAAGCCCCCAAACC  
AGTGAATGCATGGGCATCTTCTCTGCATTGATTTCATCCAAGTCATTCCGGGATTCTTACTAGA AGA  
AAAAAAGTC

Legend: Exon 24 Exon 25 Exon 26

##### *Sudemycin-induced isoform sequence*

TGTGGATCTCAGAACTATCATGGAAATAGAAGAAAGTAGACAAAAATGTGGAGCTACACCAAAGTC  
ACATTTAGGGGCATCTTCTCTGCATTGATTTCATCCAAGTCATTCCGGGATTCTTACTAGAAGAAAAAAGTC

Legend: Exon 24 Exon 26

**Supplementary Table S1: Characteristics of other hematological neoplasms samples**

| Patient <i>n</i> <sup>o</sup> . | Disease | Source | % tumoral cells <sup>†</sup> | % Cytotoxicity<br>Sudemycin D1 250<br>nM (24 h) |
|---------------------------------|---------|--------|------------------------------|-------------------------------------------------|
| MCL1                            | MCL     | PB     | 88                           | 10.8                                            |
| MCL2                            | MCL     | PB     | 94                           | 4.1                                             |
| MCL3                            | MCL     | PB     | 93                           | 74.9                                            |
| MCL4                            | MCL     | PB     | 80                           | 15.0                                            |
| MCL5                            | MCL     | PB     | 96                           | 46.9                                            |
| MCL6                            | MCL     | PB     | 97                           | 27.1                                            |
| MCL7                            | MCL     | PB     | 85                           | 21.0                                            |
| MCL8                            | MCL     | PB     | 92                           | 1.2                                             |
| FL1                             | FL      | LN     | 81                           | 2.95                                            |
| FL2                             | FL      | LN     | 84                           | 11.3                                            |
| FL3                             | FL      | LN     | 80                           | 23.2                                            |
| FL4                             | FL      | LN     | 80                           | 34.8                                            |
| MM1                             | MM      | BM     | 50                           | 4.7                                             |
| MM2                             | MM      | BM     | 74                           | 0.0                                             |
| MM3                             | MM      | BM     | 60                           | 0.0                                             |
| MM4                             | MM      | BM     | 45                           | 8.0                                             |

MCL, Mantle cell lymphoma; FL, Follicular lymphoma, MM, multiple myeloma  
 PB, peripheral blood; LN, lymph node; BM, bone marrow

<sup>†</sup>quantified by flow cytometry
